## CONTENTS

- S1 **Introduction: Defining Cases in Pediatric Bioethics**  
Aaron Wightman, Douglas Diekema
- S3 **“The Hopkins Mongol Case”: The Dawn of the Bioethics Movement**  
Norman Fost
- S9 **Who Is the Next Baby Doe? From Trisomy 21 to Trisomy 13/18 and Beyond**  
Jennifer C. Kett
- S13 **Uncertainty: An Uncomfortable Companion to Decision-making for Infants**  
Jeanne A. Krick, Jacob S. Hogue, Tyler R. Reese, Matthew A. Studer
- S18 **Adolescent Brain Development and Medical Decision-making**  
Douglas S. Diekema
- S25 **When Does a Minor’s Legal Competence To Make Health Care Decisions Matter?**  
Lois A. Weithorn
- S33 **Ethical Issues Raised by the Media Portrayal of Adolescent Transplant Refusals**  
Lainie Friedman Ross
- S42 **An Organ for My Child: Public Appeals for Limited Resources**  
Aaron Wightman, Michael Freeman
- S48 **Public Appeals Challenging Criteria for Pediatric Organ Transplantation**  
Aviva M. Goldberg
- S54 **The Charlie Gard Case, and the Ethics of Obstructing International Transfer of Seriously Ill Children**  
Dominic Wilkinson
- S60 **Reflections on Charlie Gard and the Best Interests Standard From Both Sides of the Atlantic Ocean**  
Lainie Friedman Ross
- S66 **The Suffering Child: Claims of Suffering in Seminal Cases and What To Do About Them**  
Annie B. Friedrich
- S70 **Pediatric Suffering and the Burden of Proof**  
Tyler Tate
- S75 **Defining Death: Lessons From the Case of Jahi McMath**  
Robert D. Truog
- S81 **Jahi McMath: Lessons Learned**  
Maya Scott
- S86 **Ferguson v. City of Charleston Redux: Motivated Reasoning and Coercive Interventions in Pregnancy**  
Mary Faith Marshall, Julia Taylor, Debra DeBruin
- S93 **Protection Versus Progress: The Challenge of Research on Cannabis Use During Pregnancy**  
Katherine E. MacDuffie, Natalia M. Kleinhans, Kaeley Stout, Benjamin S. Wilfond

doi: 10.1542/peds.2020-0818

American Academy  
of Pediatrics

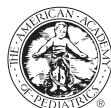

DEDICATED TO THE HEALTH OF ALL CHILDREN®

[www.pediatrics.org](http://www.pediatrics.org)
